# Supplementary material for: A high-pressure induced stable phase of Li2MnSiO4 as an effective poly-anion cathode material from simulations
Source: Royal Society of Chemistry journal article supplement (doi:10.1039/c9ta03369f), 2019-01-01
Supplement: c9ta03369f1.pdf [file c9ta03369f1.pdf]

## Electronic Supporting Information

### High-pressure induced a stable phase of $\text{Li}_2\text{MnSiO}_4$ for an effective poly-anion cathode material from simulations

Shuo Wang<sup>a</sup>, Junyi Liu<sup>a</sup>, Yu Qie<sup>a</sup>, Sheng Gong<sup>b</sup>, Cunzhi Zhang<sup>a</sup>, Qiang Sun<sup>c,d,a,\*</sup>, and Puru Jena<sup>e</sup>

<sup>a</sup> Department of Materials Science and Engineering, College of Engineering, Peking University, Beijing 100871, China

<sup>b</sup> Department of Materials Science and Engineering, Massachusetts Institute of Technology, Cambridge, MA 02139, USA

<sup>c</sup> Center for Applied Physics and Technology, Peking University, Beijing 100871, China

<sup>d</sup> Key Lab of Theory and Technology for Advanced Batteries Materials, College of Engineering, Peking University, Beijing 100871, China

<sup>e</sup> Department of Physics, Virginia Commonwealth University, Richmond, VA 23284, USA

#### Structural information

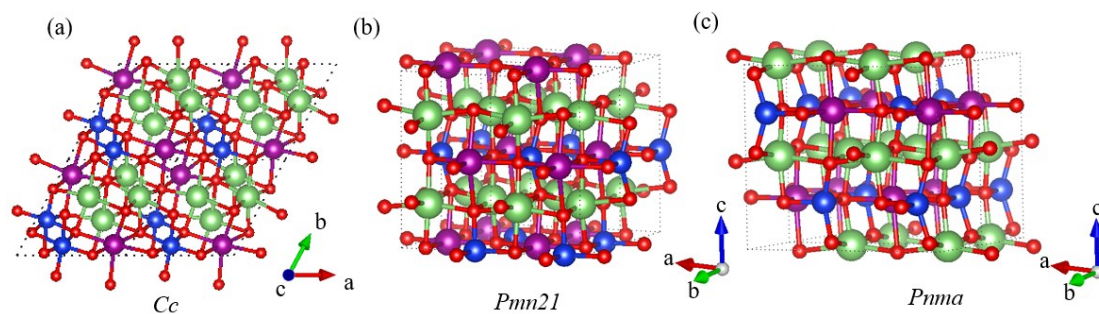

**Figure S1.** Geometry structures of different  $\text{Li}_2\text{MnSiO}_4$  with space group of (a)  $Cc$ , (b)  $Pnma$  and (c)  $Pmn21$ .

#### Structural Stability

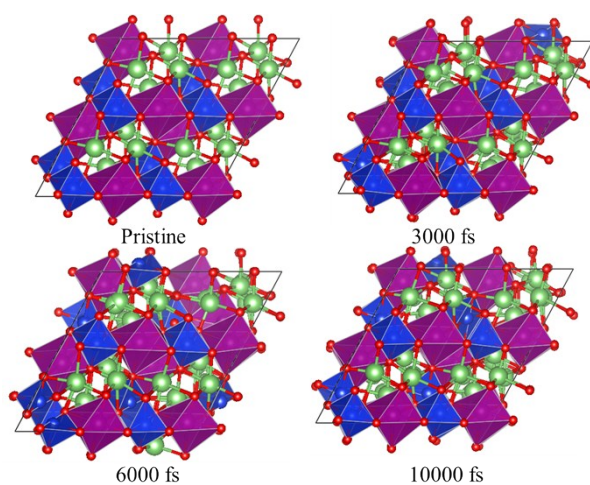

**Figure S2.** The snapshots of structural geometry of  $Cc$   $\text{Li}_2\text{MnSiO}_4$  extracted from AIMD simulation at 500K.

**Table S1.** Lattice parameters of primitive cell of predicted  $\text{Li}_2\text{MnSiO}_4$  with space group of  $Cc$  after removing the pressure.

| Symmetry | a=b (Å) | c (Å) | $\alpha=\beta(^{\circ})$ | $\gamma(^{\circ})$ |
|----------|---------|-------|--------------------------|--------------------|
| $Cc$     | 6.00    | 4.94  | 108.79                   | 58.16              |
| Atom     | $x$     | $y$   | $z$                      | Sites              |
| Li1      | 0.84    | 0.61  | 0.86                     | 2                  |
|          | 0.61    | 0.84  | 0.36                     |                    |
| Li2      | 0.37    | 0.61  | 0.84                     | 2                  |
|          | 0.61    | 0.37  | 0.34                     |                    |
| Mn       | 0.11    | 0.84  | 0.33                     | 2                  |
|          | 0.84    | 0.11  | 0.83                     |                    |
| Si       | 0.37    | 0.10  | 0.87                     | 2                  |
|          | 0.10    | 0.37  | 0.37                     |                    |
| O1       | 0.01    | 0.69  | 0.59                     | 2                  |
|          | 0.69    | 0.01  | 0.09                     |                    |
| O2       | 0.43    | 0.24  | 0.64                     | 2                  |
|          | 0.24    | 0.43  | 0.14                     |                    |
| O3       | 0.24    | 0.03  | 0.11                     | 2                  |
|          | 0.03    | 0.24  | 0.61                     |                    |
| O4       | 0.46    | 0.79  | 0.65                     | 2                  |
|          | 0.79    | 0.46  | 0.15                     |                    |

**Table S2.** The charge of Mn and O atoms in *Cc* Li<sub>2(1-x)</sub>MnSiO<sub>4</sub> ( $x=0.00, 0.25, 0.5, 0.75$ ) based on Bader Charge analysis.

| Li <sub>2(1-x)</sub> MnSiO <sub>4</sub> | $x=0.00$ | $x=0.25$ | $x=0.50$ | $x=0.75$ |
|-----------------------------------------|----------|----------|----------|----------|
| Mn1                                     | +1.55    | +1.74    | +1.90    | +1.95    |
| Mn2                                     | -1.52    | +1.63    | +1.90    | +1.94    |
| O1                                      | -1.84    | -1.68    | -1.70    | -1.52    |
| O2                                      | -1.84    | -1.78    | -1.83    | -1.61    |
| O3                                      | -1.94    | -1.79    | -1.74    | -1.61    |
| O4                                      | -1.94    | -1.78    | -1.61    | -1.50    |
| O5                                      | -1.88    | -1.77    | -1.70    | -1.51    |
| O6                                      | -1.88    | -1.79    | -1.83    | -1.86    |
| O7                                      | -1.89    | -1.85    | -1.74    | -1.68    |
| O8                                      | -1.89    | -1.66    | -1.61    | -1.41    |

**Table S3.** Energy difference  $\Delta E$  (eV) between initial and end state and migration barrier (eV) for Mn displacement to adjacent Li vacancy.

| Group symmetry    | <i>Pmn21</i> | <i>Pnma</i> | <i>Cc</i> |
|-------------------|--------------|-------------|-----------|
| $\Delta E$        | 0.53         | 0.46        | -0.23     |
| Migration barrier | 1.10         | 1.06        | 1.48      |

### Electronic properties

As a cathode material, the electronic conductivity is crucial to the overall battery performance, especially for charging/discharging efficiency. Usually, the poly-anion materials have large bandgap (>3eV) due to the strong bonding between polyanion groups and metal-containing polyhedrons. For instance, olivine-structure LiFePO<sub>4</sub> has a band gap of 4.1 eV<sup>1</sup> and shows low electron conductivity, which limits the application at low temperature. We calculate the band structure of *Cc* Li<sub>2</sub>MnSiO<sub>4</sub> using GGA+U (U=6.0 eV) as shown in Figure S2, indicating that the *Cc* phase is a semiconductor with 3.20 eV bandgap which is comparable to those of *Pnma* (3.07 eV) and *Pmn21* (3.05 eV) phases [data from Material Project<sup>2</sup>]. To get more accurate result, the band

structure is also calculated using the HSE06 functional<sup>3</sup>, which gives the band gap of 5.0 eV. The density of states suggests that the O 2p-orbital and Mn 3d-orbital mainly contribute to the states around the Fermi level, which implies the competence of redox between Mn and O during delithiation. This is different from the situations in  $\text{Li}_2\text{MnO}_3$  and  $\text{CoO}_2$ .<sup>4</sup>

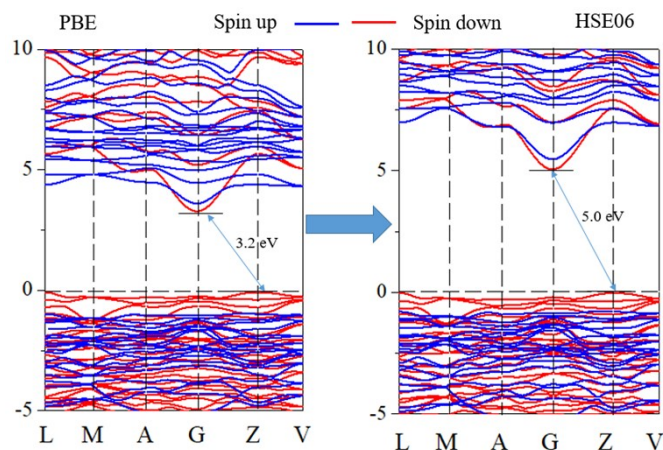

**Figure S2.** Band structures of  $Cc$   $\text{Li}_2\text{MnSiO}_4$  calculated using (a) PBE and (b) HSE06 functional.

### Ionic Diffusion

For CI-NEB calculation, two different supercells are used:  $2 \times 2 \times 3$  (256 atoms;  $a=b=12.0$  Å,  $c=14.8$  Å) and  $2 \times 2 \times 2$  supercell (128 atoms;  $a=b=12.0$  Å,  $c=9.9$  Å), both give very similar results for the energy barrier as shown in Figure S3, indicating that  $2 \times 2 \times 2$  supercell can be used for reducing the computational cost. To accelerate the ion-hopping process, temperature is elevated from 700K to 2500K. Thermalization over 4-ps with a time-step of 2 fs is carried out before diffusion calculation.

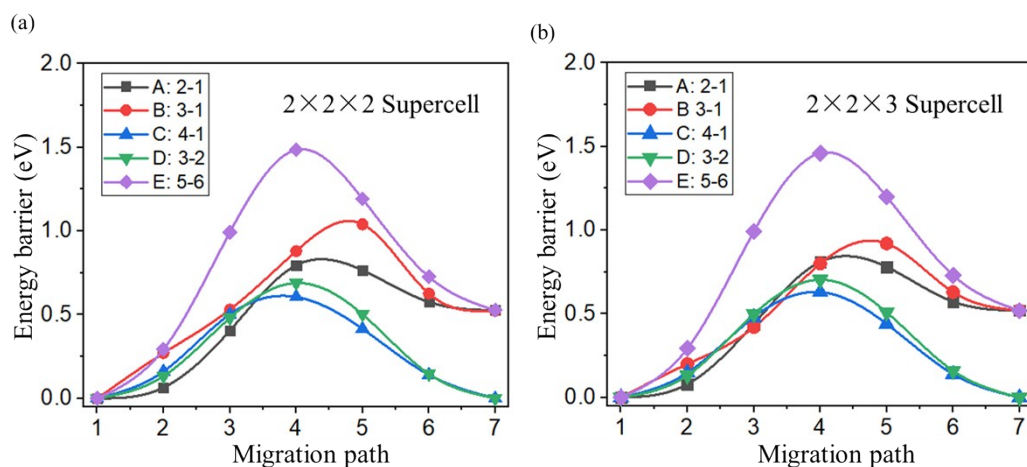

**Figure S3.** Energy barrier of Li diffusion in  $Cc$   $\text{Li}_2\text{MnSiO}_4$  in (a) a  $2 \times 2 \times 2$  supercell and (b) a  $2 \times 2 \times 3$  supercell

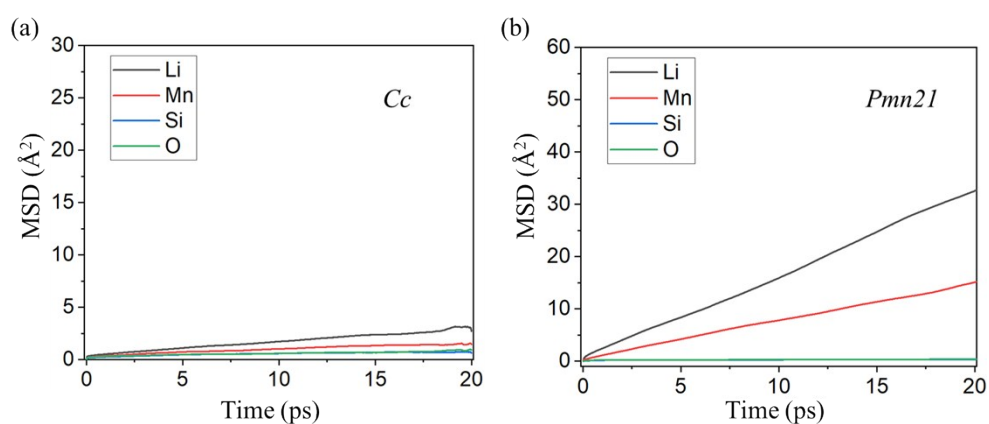

**Figure S4.** MSD for Li, Mn, Si, O atoms as a function of AIMD simulation time at different at 2000K for  $\text{Li}_2\text{MnSiO}_4$  of (a) *Cc* phase and (b) *Pmn21* phase. Same carrier concentration is used that 8 vacancies are introduced into a  $2 \times 2 \times 2$  supercell both for predict and experimental phases.

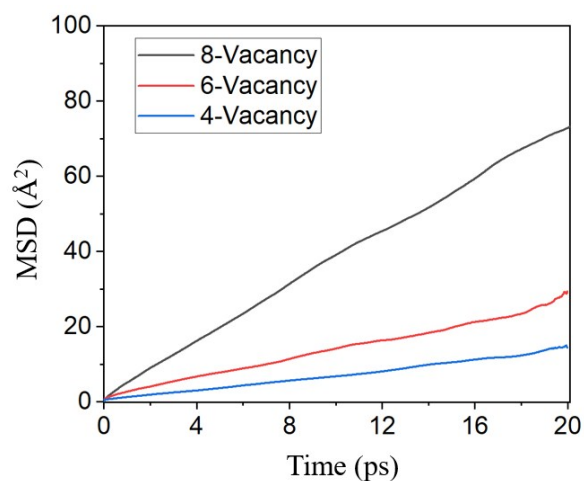

**Figure S5.** MSD of Li ion diffusion in a  $2 \times 2 \times 2$  supercell of *Cc*  $\text{Li}_2\text{MnSiO}_4$  with different carrier concentration by introducing 8, 6 and 4 vacancies.

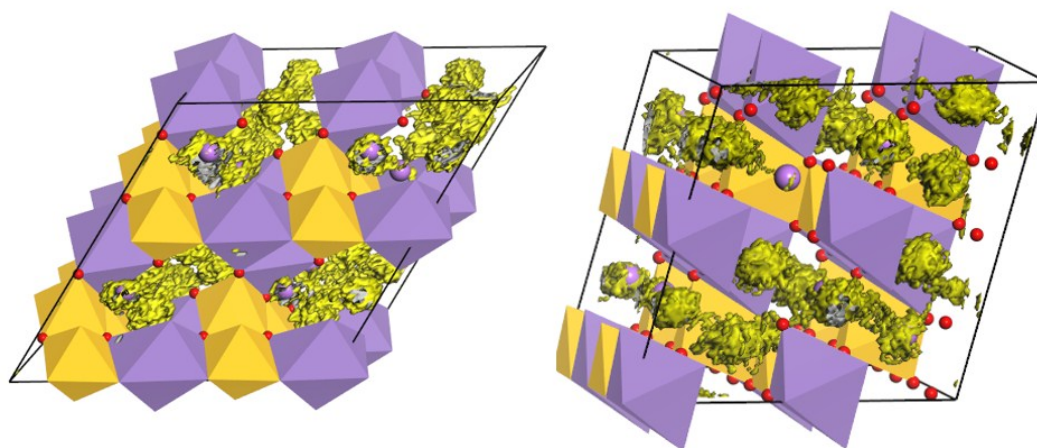

**Figure S6.** Projection of Li trajectories (yellow) in different views at 1500 K in a  $2 \times 2 \times 2$  supercell

of *Cc* Li<sub>2</sub>MnSiO<sub>4</sub>.

### References

- [1] A. K. Padhi, K. S. Nanjundaswamy, and J. B. Goodenough, *Journal of the electrochemical society* **144**, 1188 (1997).
- [2] A. Jain *et al.*, *Apl Materials* **1**, 11002 (2013).
- [3] J. Heyd, *Journal of Chemical Physics* **118**, 8207 (2003).
- [4] S. Wang, J. Liu, and Q. Sun, *Journal of Materials Chemistry A* **5** (2017).
